# Supplementary material for: Metabolic Obesity Phenotypes and Risk of Cellulitis: A Cohort Study
Source: PubMed Central journal article supplement (PMC6679047; doi:10.3390/jcm8070953), 2019-06-30
Supplement: jcm-08-00953-s001.pdf [file jcm-08-00953-s001.pdf]

**Supplemental Table S1.** Baseline characteristics of study participants by body mass index category.

| Characteristic                              | Overall              | Missing Data Group     | Final Inclusion Group  | p Value |
|---------------------------------------------|----------------------|------------------------|------------------------|---------|
| Number                                      | 210,038              | 38,716                 | 171,322                |         |
| Age (years) <sup>1</sup>                    | 38.8 (8.7)           | 43.1 (10.1)            | 37.9 (8)               | <0.001  |
| Male (%)                                    | 54.2                 | 54.7                   | 54                     | 0.014   |
| Fatty liver (%)                             | 26.5                 | 28.9                   | 25.9                   | <0.001  |
| Current smoker (%)                          | 22.8                 | 24.1                   | 22.5                   | <0.001  |
| Alcohol intake (%) <sup>2</sup>             | 24                   | 27.4                   | 23.2                   | <0.001  |
| HEPA (%)                                    | 16.6                 | 17.9                   | 16.3                   | <0.001  |
| Higher education (%) <sup>3</sup>           | 79.4                 | 77.9                   | 79.7                   | <0.001  |
| Systolic BP (mmHg) <sup>1</sup>             | 109.2 (13)           | 109.8 (13.3)           | 109.1 (12.9)           | <0.001  |
| Diastolic BP (mmHg) <sup>1</sup>            | 69.9 (9.9)           | 70.6 (10)              | 69.8 (9.8)             | <0.001  |
| Glucose (mg/dL) <sup>1</sup>                | 93.5 (8.5)           | 94.4 (8.6)             | 93.3 (8.4)             | <0.001  |
| Total cholesterol (mg/dL) <sup>1</sup>      | 193.7 (34.0)         | 196.3 (34.1)           | 193.2 (33.9)           | <0.001  |
| LDL-C (mg/dL) <sup>1</sup>                  | 120.2 (31.9)         | 122.9 (32.2)           | 119.6 (31.8)           | <0.001  |
| HDL-C (mg/dL) <sup>1</sup>                  | 58.9 (15.2)          | 59.1 (15.5)            | 58.9 (15.1)            | 0.013   |
| Triglycerides (mg/dL) <sup>4</sup>          | 89 (63–132)          | 92 (65–135)            | 89 (63–131)            | <0.001  |
| ALT (U/L) <sup>4</sup>                      | 18 (13–27)           | 18 (13–26)             | 18 (12–27)             | 0.039   |
| hsCRP (mg/L) <sup>4</sup>                   | 0.4 (0.2–0.9)        | 0.5 (0.3–1.1)          | 0.4 (0.2–0.9)          | <0.001  |
| HOMA-IR <sup>4</sup>                        | 1.17 (0.77–1.73)     | 1.22 (0.81–1.8)        | 1.16 (0.77–1.72)       | <0.001  |
| Total energy intake (kcal/d) <sup>2,5</sup> | 1482.5 (1089–1889.6) | 1439.6 (1038.8–1842.2) | 1491.2 (1098.9–1899.6) | <0.001  |
| Charlson comorbidity index                  |                      |                        |                        |         |
| 1–2 (%)                                     | 0.15                 | 0.19                   | 0.14                   | 0.014   |
| ≥3 (%)                                      | 0.01                 | 0.01                   | 0.01                   | 0.773   |

Data are <sup>1</sup>mean (standard deviation), <sup>4</sup>median (interquartile range), or percentage. <sup>2</sup>≥20 g of ethanol per day; <sup>3</sup>≥College graduate. ALT = alanine aminotransferase, BMI = body mass index, BP = blood pressure, HDL-C = high-density lipoprotein cholesterol, HEPA = health-enhancing physical activity, hsCRP = high sensitivity C-reactive protein, HOMA-IR = homeostasis model assessment of insulin resistance, LDL-C = low-density lipoprotein cholesterol. <sup>5</sup>among 171,582 participants with plausible estimated energy intake levels (within three standard deviations from the log-transformed mean energy intake).
